# Supplementary material for: Overcoming the IOTLB wall for multi-100-Gbps Linux-based networking
Source: PeerJ journal article supplement (doi:10.7717/peerj-cs.1385), 2023-05-16
Supplement: AppendixA79056.pdf [file AppendixA79056.pdf]

## A TESTBED ILLUSTRATION AND ADDITIONAL RESULTS

Figure 17 illustrates our testbed. We use the main slot of a Socket Direct ConnectX-6 for 200-Gbps experiments and a normal ConnectX-6 NIC with custom Dell firmware for 100-Gbps experiments.

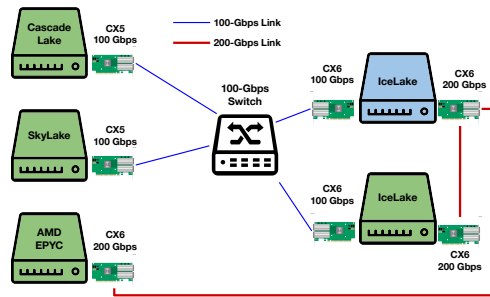

**Figure 17.** Our testbed. Green servers represent DUTs. CX5 and CX6 stand for ConnectX-5 and ConnectX-6, respectively.

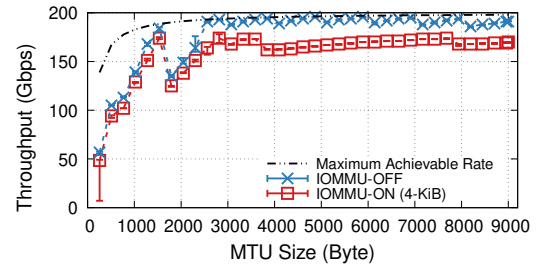

**Figure 18.** IOMMU imposes performance overheads at all MTU sizes, but with a larger absolute throughput drop for MTU sizes larger than  $\sim 3000$  B.

Figure 18 shows the throughput for a fine-grained sweep of MTU values when the NIC uses 1024 RX descriptors per queue (*i.e.*,  $32 \times 1024$  RX descriptors). Looking at the throughput values, we notice jumps at page splitting points. The `m1x5` driver splits pages based on the Hardware (H/W) MTU size that is 22 B larger than the value specified by the software (*e.g.*, via `ifconfig`). The extra 22 B ensures that the H/W buffer has enough space for the 14-B Ethernet header, 4-B VLAN header, and 4-B Ethernet Frame Check Sequence (FCS). The `m1x5` driver uses 512-B buffers for small H/W MTUs, but switches to 1024-B, 2048-B, and 4096-B buffers when the H/W MTU size exceeds 128, 640, and 1664 bytes. The driver uses a scatter-gather technique (*e.g.*, it uses multiple 256-B buffers) for “Jumbo” frames, *i.e.*, H/W MTU sizes  $> 3712$  B.
